# Supplementary material for: Association of endothelial dysfunction with incident prediabetes, type 2 diabetes and related traits: the KORA F4/FF4 study
Source: PubMed Central journal article supplement (PMC7373312; doi:10.1136/bmjdrc-2020-001321), 2020-07-20
Supplement: bmjdrc-2020-001321supp001.pdf [file bmjdrc-2020-001321supp001.pdf]

1 **Supplementary File -**  
2 **Association of endothelial dysfunction with incident**  
3 **prediabetes, type 2 diabetes and related traits: the KORA**  
4 **F4/FF4 study**

5

6 Authors: Marie-Theres Huemer <sup>1,2</sup>, Cornelia Huth <sup>1,3</sup>, Florian Schederecker <sup>1</sup>, Stefanie J. Klug <sup>2</sup>,  
7 Christa Meisinger <sup>4,5</sup>, Wolfgang Koenig <sup>6,7,8</sup>, Wolfgang Rathmann <sup>3,9</sup>, Annette Peters <sup>1,3</sup>, Barbara  
8 Thorand <sup>1,3</sup>

9

10 <sup>1</sup>Institute of Epidemiology, Helmholtz Zentrum München, German Research Center for Environmental  
11 Health (GmbH), Neuherberg, Germany

12 <sup>2</sup>Department of Sport and Health Sciences, Chair of Epidemiology, Technical University Munich,  
13 Munich, Germany

14 <sup>3</sup>German Center for Diabetes Research (DZD), Neuherberg, Germany

15 <sup>4</sup>Independent Research Group Clinical Epidemiology, Helmholtz Zentrum München, German  
16 Research Center for Environmental Health, Neuherberg, Germany

17 <sup>5</sup>Chair of Epidemiology at UNIKA-T Augsburg, Ludwig-Maximilians-Universität München, Augsburg,  
18 Germany

19 <sup>6</sup>Institute of Epidemiology and Medical Biometry, Ulm University, Ulm, Germany

20 <sup>7</sup>Deutsches Herzzentrum München, Technische Universität München, Munich, Germany

21 <sup>8</sup>DZHK (German Centre for Cardiovascular Research), partner site Munich Heart Alliance,  
22 Technische Universität München, Munich, Germany

23 <sup>9</sup>Institute of Biometrics and Epidemiology, German Diabetes Center, Leibniz Center for Diabetes  
24 Research, Heinrich Heine University Düsseldorf, Düsseldorf, Germany

25

26 **Corresponding author:**

27 Prof. Dr. Barbara Thorand

28 Email: thorand@helmholtz-muenchen.de

29 Table S1: Association of baseline RHI and MBA with follow-up insulin and glucose  
 30 parameters (NGT at baseline)

31

|                                            | Model 1                    |                  | Model 2                    |                  |
|--------------------------------------------|----------------------------|------------------|----------------------------|------------------|
| RHI                                        | $\beta$ (95%CI)            | P                | $\beta$ (95%CI)            | P                |
| Fasting glucose (mmol/l) <sup>a</sup>      | -0.033<br>(-0.075, 0.008)  | 0.116            | -0.029<br>(-0.071, 0.013)  | 0.181            |
| 2 h glucose (mmol/l) <sup>b</sup>          | -0.052<br>(-0.107, 0.003)  | 0.066            | -0.044<br>(-0.098, 0.010)  | 0.114            |
| Fasting insulin ( $\mu$ U/ml) <sup>c</sup> | -0.062<br>(-0.125, 0.0004) | 0.053            | -0.069<br>(-0.131, -0.007) | <b>0.030</b>     |
| HOMA-IR <sup>a</sup>                       | -0.066<br>(-0.129, -0.004) | <b>0.039</b>     | -0.072<br>(-0.133, -0.010) | <b>0.023</b>     |
| HOMA-beta (%) <sup>a</sup>                 | -0.037<br>(-0.101, 0.028)  | 0.270            | -0.046<br>(-0.112, 0.020)  | 0.174            |
| HbA1c (mmol/mol) <sup>d</sup>              | -0.018<br>(-0.065, 0.029)  | 0.458            | -0.025<br>(-0.072, 0.022)  | 0.296            |
| MBA                                        | $\beta$ (95%CI)            | P                | $\beta$ (95%CI)            | P                |
| Fasting glucose (mmol/l) <sup>a</sup>      | 0.118<br>(0.070, 0.166)    | <b>&lt;0.001</b> | 0.096<br>(0.047, 0.146)    | <b>&lt;0.001</b> |
| 2 h glucose (mmol/l) <sup>b</sup>          | 0.083<br>(0.018, 0.149)    | <b>0.013</b>     | 0.040<br>(-0.026, 0.105)   | 0.238            |
| Fasting insulin ( $\mu$ U/ml) <sup>c</sup> | 0.067<br>(-0.007, 0.141)   | 0.077            | 0.021<br>(-0.053, 0.096)   | 0.573            |
| HOMA-IR <sup>a</sup>                       | 0.096<br>(0.022, 0.170)    | <b>0.011</b>     | 0.050<br>(-0.024, 0.123)   | 0.188            |
| HOMA-beta (%) <sup>a</sup>                 | -0.030<br>(-0.105, 0.046)  | 0.444            | -0.065<br>(-0.143, 0.014)  | 0.106            |
| HbA1c (mmol/mol) <sup>d</sup>              | 0.069<br>(0.014, 0.124)    | <b>0.015</b>     | 0.051<br>(-0.005, 0.107)   | 0.078            |

- 32 Effect estimates per one standard deviation increased RHI or increased MBA estimated by multivariable linear  
33 regression models (only participants with normal glucose tolerance at baseline).
- 34 Abbreviations: HbA1c, hemoglobin A1c; HOMA-beta, homeostasis model assessment of beta-cell function;  
35 HOMA-IR, homeostasis model assessment of insulin resistance; MBA, mean baseline amplitude; RHI, reactive  
36 hyperemia index.
- 37 Significant values are presented in bold.
- 38 Model 1 (Basic model) = age, sex, baseline value of the outcome.
- 39 Model 2 (Further risk factors) = model 1 + waist circumference, height, triglycerides, total cholesterol/HDL,  
40 hypertension, smoking status, alcohol intake, physical activity, years of education, high-sensitive C-reactive  
41 protein, parental history of diabetes.
- 42 <sup>a</sup> n = 509; <sup>b</sup> n = 495; <sup>c</sup> n = 510; <sup>d</sup> n = 511

43 Table S2: Association of baseline RHI and MBA with follow-up insulin and glucose  
 44 parameters (prediabetes at baseline)

45

|                                            | Model 1                   |       | Model 2                   |       |
|--------------------------------------------|---------------------------|-------|---------------------------|-------|
| RHI                                        | $\beta$ (95%CI)           | P     | $\beta$ (95%CI)           | P     |
| Fasting glucose (mmol/l) <sup>a</sup>      | -0.076<br>(-0.299, 0.146) | 0.504 | -0.022<br>(-0.261, 0.218) | 0.860 |
| 2 h glucose (mmol/l) <sup>b</sup>          | -0.092<br>(-0.320, 0.135) | 0.429 | -0.085<br>(-0.334, 0.164) | 0.504 |
| Fasting insulin ( $\mu$ U/ml) <sup>c</sup> | 0.068<br>(-0.045, 0.181)  | 0.243 | 0.085<br>(-0.034, 0.204)  | 0.163 |
| HOMA-IR <sup>a</sup>                       | 0.058<br>(-0.064, 0.179)  | 0.354 | 0.076<br>(-0.051, 0.203)  | 0.241 |
| HOMA-beta (%) <sup>a</sup>                 | 0.053<br>(-0.078, 0.185)  | 0.429 | 0.076<br>(-0.066, 0.218)  | 0.298 |
| HbA1c (mmol/mol) <sup>d</sup>              | -0.150<br>(-0.346, 0.046) | 0.137 | -0.161<br>(-0.365, 0.042) | 0.123 |
| MBA                                        | $\beta$ (95%CI)           | P     | $\beta$ (95%CI)           | P     |
| Fasting glucose (mmol/l) <sup>a</sup>      | -0.133<br>(-0.351, 0.086) | 0.237 | -0.133<br>(-0.377, 0.110) | 0.284 |
| 2 h glucose (mmol/l) <sup>b</sup>          | 0.019<br>(-0.211, 0.249)  | 0.871 | 0.090<br>(-0.171, 0.351)  | 0.501 |
| Fasting insulin ( $\mu$ U/ml) <sup>c</sup> | -0.063<br>(-0.173, 0.048) | 0.269 | -0.074<br>(-0.198, 0.050) | 0.245 |
| HOMA-IR <sup>a</sup>                       | -0.090<br>(-0.209, 0.029) | 0.140 | -0.090<br>(-0.222, 0.043) | 0.187 |
| HOMA-beta (%) <sup>a</sup>                 | 0.019<br>(-0.110, 0.147)  | 0.775 | -0.018<br>(-0.164, 0.128) | 0.806 |
| HbA1c (mmol/mol) <sup>d</sup>              | -0.081<br>(-0.273, 0.111) | 0.408 | -0.054<br>(-0.263, 0.154) | 0.612 |

- 46 Effect estimates per one standard deviation increased RHI or increased MBA estimated by multivariable linear  
47 regression models (only participants with prediabetes at baseline).
- 48 Abbreviations: HbA1c, hemoglobin A1c; HOMA-beta, homeostasis model assessment of beta-cell function;  
49 HOMA-IR, homeostasis model assessment of insulin resistance; MBA, mean baseline amplitude; RHI, reactive  
50 hyperemia index.
- 51 Model 1 (Basic model) = age, sex, baseline value of the outcome.
- 52 Model 2 (Further risk factors) = model 1 + waist circumference, height, triglycerides, total cholesterol/HDL,  
53 hypertension, smoking status, alcohol intake, physical activity, years of education, high-sensitive C-reactive  
54 protein, parental history of diabetes.
- 55 <sup>a</sup> n = 509; <sup>b</sup> n = 495; <sup>c</sup> n = 510; <sup>d</sup> n = 511

56

57

58

59

60

61

62

63

64

65

66

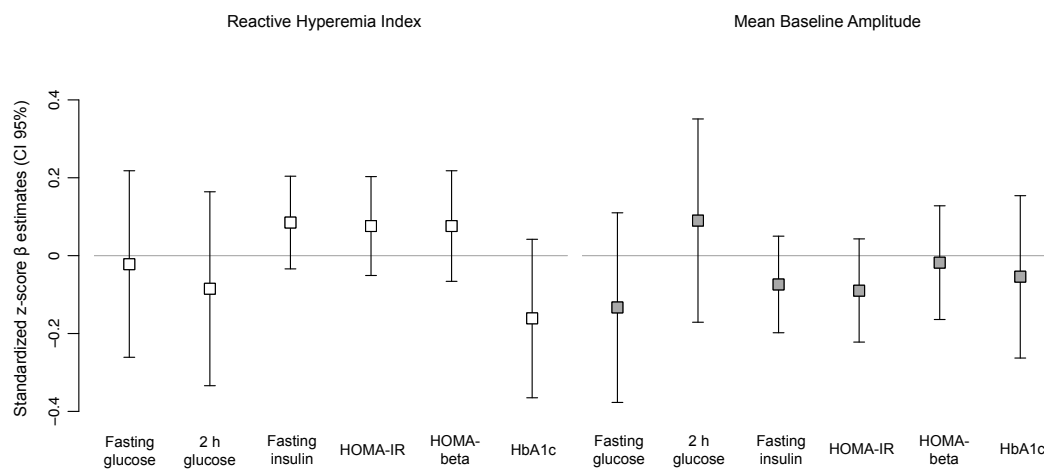

67 Figure S1: Association of baseline RHI and MBA with follow-up insulin and glucose parameters (prediabetes at  
68 baseline).

69 Standardized z-score  $\beta$  estimates with 95 % confidence intervals for the association of insulin and glucose  
70 parameters per one standard deviation increase in RHI and MBA estimated by multivariable linear regression  
71 models (only participants with prediabetes at baseline).

72 Results are from model 2 adjusted for age, sex, the baseline value (at F4) of the outcomes, waist circumference,  
73 height, triglycerides, total cholesterol/HDL, hypertension, smoking status, alcohol intake, physical activity, years  
74 of education, high-sensitive C-reactive protein, and parental history of diabetes.

75 Abbreviations: HbA1c, hemoglobin A1c; HOMA-beta, homeostasis model assessment of beta-cell function;

76 HOMA-IR, homeostasis model assessment of insulin resistance; MBA, mean baseline amplitude; RHI, reactive

77 hyperemia index.

78 **Detailed description of the exposure measurements: Peripheral arterial tonometry –**

79 **EndoPAT2000**

80 The EndoPAT2000 consists of biosensors that are attached to both index fingers creating a  
81 consistent pressure field within the upper two-thirds of the fingers. The pressure prevents  
82 distal venous blood pooling and therefore a vasoconstriction reflex. Moreover, the pressure  
83 increases the attachment of the sensors to the finger, which reduces movement artifacts.  
84 Additionally, the online display allows for real-time viewing to control if the measurement  
85 functions properly (1). The pulse wave amplitude was measured before and after occlusion  
86 of the upper arm, which was used to provoke incremental blood flow after the release of the  
87 occlusion. The principle of the measurement is based on the increase in vasodilation of the  
88 blood vessels initiated by the increased blood flow. The occlusion using a blood pressure  
89 cuff was only performed on one upper arm to occlude the brachial artery. The other  
90 arm/finger served as a control. Various studies present different positions for the fixation of  
91 the blood pressure cuff, either the forearm or the upper arm (2-4). However, there is no  
92 significant difference in the PAT ratio after occluding the forearm or the upper arm (5).  
93 Generally, the blood pressure cuff is being inflated for 5 minutes because the maximum  
94 response of blood flow occlusion is reached after 5 minutes of occlusion (5).

95 The exposure of interest is the endothelial function represented through the variable reactive  
96 hyperemia index (RHI), which was calculated as:

97 A= Mean pulse amplitude of the occluded arm post occlusion

98 B= Mean pulse amplitude of the occluded arm pre occlusion

99 C= Mean pulse amplitude of the control arm post occlusion

100 D= Mean pulse amplitude of the control arm pre occlusion

$$\text{RHI} = \frac{A/B}{C/D} \times \text{Baseline Correction}$$

101 The value for each compartment of the calculation was based on the amplitude of the pulse  
102 waves. A mean of the amplitudes was built for every time period (baseline, post occlusion)  
103 and arm/finger (occluded, control). The A/B is the dilation index, represented by the values

104 pre and post occlusion of the occluded arm and the C/D is the systemic correction of the pre  
105 and post occlusion values of the control arm (no occlusion). The control arm measurements  
106 serve as a control for concurrent non-endothelial dependent changes in vascular tone. The  
107 mean pulse amplitude of the occluded arm was further used as a baseline correction to  
108 reduce the internal influence on the RHI (1).

109

110 Prior to the PAT measurement, the participants received a standardized breakfast including  
111 one bread roll or two small slices of whole-grain bread with honey or marmalade, some  
112 butter or margarine and either a cup of coffee or tea. Not allowed were sausages, cheese,  
113 and fruit juice. Before the PAT measurement started, certain exclusion criteria were  
114 assessed. Participants with a latex allergy, hemophilia, thrombosis or a shunt at the arm  
115 (dialysis patients) were not allowed to participate. The PAT measurements were performed  
116 by well-trained medical staff. The ambient conditions included a quiet and undisturbed room  
117 (no one was allowed to come in during measurements), consistent room temperature  
118 between 21 °C and 24 °C and switching off bright lighting as well as cell phones. The Endo-  
119 PAT2000 was switched on 20 minutes before the first measurement and to ensure signal  
120 transmission between sensors and laptop test samples were used. As the participant  
121 arrived, the measurement was explained and his or her hands were checked for extremely  
122 high or low temperature. If this was the case, the measurement was delayed until the  
123 participant's hands reached normal temperature. Overall, the whole procedure lasted  
124 around 25 minutes. The participant was asked to take off jewelry, watches as well as tight  
125 clothing constricting the arm. If the participant's fingernails were very long, he or she was  
126 asked if the operator could cut them to an appropriate length for the measurement. If this  
127 was not feasible, the lengths of the fingernails were noted within the input mask of the  
128 laptop. Before the measurement started, the participant filled out a questionnaire about  
129 recent smoking, physical activity, and nutrition. Starting the measurement, the participant  
130 laid down on an examination table on his or her back, the hand at the level of the heart. The  
131 participant was asked to stay calm and relaxed during the whole procedure. Starting the



132 measurement, the blood pressure cuff was fixed on the participant's non-dominant upper  
133 arm. Afterward, the sensors were attached to the index fingers as well as inflated to create  
134 the constant pressure described before. Polystyrene and mull was used to keep the fingers  
135 apart. After testing the signal quality, the baseline measurement was performed for 5  
136 minutes. From this point on the recording started and lasted throughout the whole  
137 procedure. The blood pressure cuff was inflated at 60 mmHg over the systolic blood  
138 pressure and released after 5 minutes. The recording proceeded for another 5 minutes.  
139 Afterward, the quality of the measurement was examined, the data was saved and the  
140 participant was released.

141

142 **Detailed description of the diabetes definition:**

143 Diabetes was diagnosed if the fasting serum glucose was  $\geq 7.0$  mmol/l or the 2 h serum  
144 glucose was  $\geq 11.1$  mmol/l. An i-IGT was diagnosed if the fasting glucose was  $< 6.1$  mmol/l  
145 and the 2 h glucose was  $\geq 7.8$  mmol/l but  $< 11.1$  mmol/l. An i-IFG was determined if the  
146 fasting glucose was  $\geq 6.1$  mmol/l but  $< 7.0$  mmol/l and the 2 h glucose was  $< 7.8$  mmol/l. The  
147 combination IFG/IGT was diagnosed if fasting glucose was  $\geq 6.1$  mmol/l but  $< 7.0$  mmol/l  
148 and the 2 h glucose was  $\geq 7.8$  mmol/l but  $< 11.1$  mmol/l. NGT was determined if the fasting  
149 glucose was  $< 6.1$  mmol/l and 2 h glucose  $< 7.8$  mmol/l.

150

151 **Detailed description of the covariates:**

152 Smoking status was classified as never, former or current smoker. A current smoker was  
153 defined as smoking at least one cigarette per day. The physical activity level was estimated  
154 using two separate four-category interview questions asking about the time per week spent  
155 on sports activities during leisure time (including cycling) in summer and winter (0,  $<1$ , 1 to 2,  
156 and  $>2$  h exercise/week). The winter and summer responses were combined to create one  
157 variable of leisure-time physical activity. The participants were categorized into either "no  
158 activity" defined as less than 1 h sports in summer and winter, "low activity" defined as  
159 irregular participation in sports for less than 1 h per week in either summer or winter and not

160 more than 2 h in the other season, “moderate activity” defined as regular participation in  
161 sports for about 1-2 h per week in both seasons or “high activity” defined as regular sports in  
162 summer and winter for more than 2 h per week. The variable education was defined based  
163 on the years of education, either > 10 years or ≤ 10 years. The alcohol intake was calculated  
164 in grams per day based on information regarding the intake of alcoholic beverages on the  
165 previous workday and during the previous weekend. Alcohol intake was classified into three  
166 sex-specific categories: men: 0 g/day, 0.1-39.9 g/day, and ≥ 40 g/day; women: 0 g/day, 0.1-  
167 19.9 g/day, and ≥ 20 g/day.(6) Parental history of diabetes was categorized based on self-  
168 report into either no parent, unknown, one parent or both parents. The fasting blood samples  
169 obtained before the OGTT were used to determine high-density lipoprotein (HDL), total  
170 cholesterol, triglycerides, and high-sensitive C-reactive protein (hsCRP). Total cholesterol  
171 and HDL were assessed in fresh serum by enzymatic methods (CHOL Flex and AHDL Flex,  
172 Dade Behring, Marburg, Germany).(7) Triglycerides were assessed using the Boehringer  
173 GPO-PAP assay.(8) HsCRP was measured from frozen plasma using a high-sensitive latex  
174 enhanced nephelometric assay on a BN 2 analyzer (Dade Behring, Marburg, Germany).(7)  
175 Blood pressure was measured in sitting position on the right arm three times in three-minute  
176 intervals after an at least 5-minute rest. The mean of the second and third measurement was  
177 used. Participants with a blood pressure of ≥ 140/90 mmHg or intake of antihypertensive  
178 medication given that participants were aware of having hypertension were classified as  
179 having hypertension. Weight, height, and waist circumference were measured with  
180 participants in light clothing and without shoes.(6)

181

182 **Detailed description of the loss to follow up of the KORA studies S4-F4 and F4-FF4:**

183 KORA S4: 4261 participants

184 - 174 deaths before KORA-F4 examination

185 - 6 moved to an unknown location

186 - 198 moved outside the study region

187 - 12 refused to be contacted

188 3871 participants eligible

189 - 615 refused

190 - 176 no contact possible

191 = **3080 KORA-F4 participants**

192

193 KORA F4: 3080 participants

194 - 168 deaths before KORA-FF4 examination

195 - 11 moved to an unknown location

196 - 86 moved outside the study region

197 - 67 refused to be contacted

198 2748 participants eligible

199 - 539 refused

200 - 48 no contact possible

201 = **2161 KORA-FF4 participants**

202

203 The response rate (including death) of all study participants from F4 to FF4 is 70.2 % (29.8

204 % lost to follow-up). In the present analysis, the response rate of the participants from F4 to

205 FF4 is 75.7 % (24.3 % lost to follow-up).

206

207 **Literature:**

208 1. Itamar Medical. Assessing endothelial function overview & scientific validation of

209 EndoPAT. 2016.

210 2. Brant LC, Hamburg NM, Barreto SM, Benjamin EJ, Ribeiro AL. Relations of digital

211 vascular function, cardiovascular risk factors, and arterial stiffness: the Brazilian

212 Longitudinal Study of Adult Health (ELSA-Brasil) cohort study. J Am Heart Assoc.

213 2014;3(6):e001279.

- 214 3. Hamburg NM, Keyes MJ, Larson MG, Vasan RS, Schnabel R, Pryde MM, et al. Cross-  
215 sectional relations of digital vascular function to cardiovascular risk factors in the  
216 Framingham Heart Study. *Circulation*. 2008;117(19):2467-74.
- 217 4. Schnabel RB, Schulz A, Wild PS, Sinning CR, Wilde S, Eleftheriadis M, et al.  
218 Noninvasive vascular function measurement in the community: cross-sectional relations  
219 and comparison of methods. *Circ Cardiovasc Imaging*. 2011;4(4):371-80.
- 220 5. Faizi A, Kornmo D, Agewall S. Evaluation of endothelial function using finger  
221 plethysmography. In: University AUHaO, editor. 2009.
- 222 6. Meisinger C, Thorand B, Schneider A, Stieber J, Döring A, Löwel H. Sex differences in  
223 risk factors for incident type 2 diabetes mellitus: the MONICA Augsburg cohort study.  
224 *Arch Intern Med*. 2002;162(1):82-9.
- 225 7. Huth C, Beuerle S, Zierer A, Heier M, Herder C, Kaiser T, et al. Biomarkers of iron  
226 metabolism are independently associated with impaired glucose metabolism and type 2  
227 diabetes: the KORA F4 study. *Eur J Epidemiol*. 2015;173(5):643-53.
- 228 8. Rathmann W, Haastert B, Icks A, Lowel H, Meisinger C, Holle R, et al. High prevalence  
229 of undiagnosed diabetes mellitus in Southern Germany: target populations for efficient  
230 screening. *The KORA survey 2000. Diabetologia*. 2003;46(2):182-9.  
231
